## Temperature Correction of Arterial Blood-gas Values

*To the Editor:*—Andritsch *et al.* recently reviewed the methods by which blood-gas values measured at 37° C can be corrected to patients' body temperature, but failed to make a case for why this correction needs to be done other than to say that "the need for accurate diagnosis and appropriate intervention requires (this)."<sup>1</sup> Alteration in body temperature is an unnatural state in homeotherms. Normal blood-gas values in homeotherms refer to body temperature at 37° C. Blood-gas values corrected to patient's body temperature other than 37° C are difficult to interpret because normal values for different temperatures are not known.

Blood-gas values provide information about oxygenation, ventilation, and acid-base (metabolic) status. Temperature correction is essential to assess oxygenation ( $P_{O_2}$ ), but may be unnecessary to determine adequacy of ventilation ( $P_{CO_2}$ ) and acid-base status of blood ( $pH$ ). When blood is collected anaerobically in a syringe and cooled,  $P_{CO_2}$  decreases the  $pH$  increases while  $CO_2$  content is unchanged. Though it appears alkaline, the relative alkalinity of blood with respect to neutral water is unchanged because  $pH$  of neutral water also increases with cooling.<sup>2,3</sup> Howell *et al.* and Rahn *et al.* have shown that *in vivo* changes in  $P_{CO_2}$  and  $pH$  in poikilotherms, which change body temperature with ambient temperature, are very similar to *in vitro* changes that take place in an anaerobic sample that is cooled.<sup>2,\*</sup> Reeves has also shown that factors affected by changes in  $pH$  at a constant temperature brought about by titration of acid, are unaffected by changes in  $pH$  brought about by temperature changes. Thus, net charge on protein buffer (im-

idazole) and Donnan distribution of ions across (red) cell membrane are unchanged when  $pH$  increases as blood is cooled.<sup>3,4</sup> The implication of these findings is that  $P_{CO_2}$  and  $pH$  changes brought about by changes in temperature do not alter the acid-base status of blood and has led Rahn to suggest that in order to interpret acid-base status of a patient who is hypothermic, one need only look at the values measured at 37° C. If  $P_{CO_2}$  and  $pH$  measured at 37° C were 40 mmHg and 7.4, respectively, then the acid-base status of the patient is unperturbed for whatever temperature existed at the time the specimen was drawn.<sup>5</sup> Blayo *et al.* recently confirmed this in patients undergoing cardiac operations during hypothermia.<sup>6</sup>

MURALI SIVARAJAN, M.D.

Associate Professor

Department of Anesthesiology RN-10

University of Washington

Seattle, Washington 98195

## REFERENCES

1. Andritsch RF, Muravchick S, Gold MI: Temperature correction of arterial blood gas parameters: A comparative review of methodology. *ANESTHESIOLOGY* 55:311-316, 1981
2. Howell BJ, Baumgardner FW, Bondi K, et al: Acid-base balance in cold blooded vertebrates as a function of body temperature. *Am J Physiol* 218:600-606, 1970
3. Reeves RB: An imidazole alphasat hypothesis for vertebrate acid-base regulation: Tissue carbon dioxide content and body temperature in bullfrogs. *Respir Physiol* 14:219-236, 1972
4. Reeves RB: Temperature induced changes in cell volume. *J Appl Physiol* 40:762-767, 1976
5. Rahn H: Body temperature and acid-base regulation. *Pneumologie* 151:87-94, 1974
6. Blayo MC, Lecompte Y, Pocidale JJ: Control of acid-base status during hypothermia in man. *Respir Physiol* 42:287-298, 1980

(Accepted for publication October 13, 1981.)

\* Rahn H: Acid-base regulations and temperature in the evolution of vertebrates. *Proc Int Union Physiol* 8:91-92, 1971.
